# Supplementary material
Source: PubMed Central journal article supplement (PMC3928990)
Supplement: ja4046857_si_001.pdf [file ja4046857_si_001.pdf]

# ‘Multicopy Multivalent’ Glycopolymer-stabilised Gold Nanoparticles as Potential Synthetic Cancer Vaccines – Supporting Information

Alison L. Parry<sup>1,2</sup>, Natasha A. Clemson<sup>1</sup>, James Ellis<sup>1</sup>, Stefan S.R. Bernhard<sup>1</sup>, Benjamin G. Davis<sup>\*,2</sup> and Neil R. Cameron<sup>\*,1</sup>

<sup>1</sup> Department of Chemistry and Biophysical Sciences Institute, Durham University, South Road, Durham, DH1 3LE, U.K.

<sup>2</sup> Department of Chemistry, University of Oxford, Chemistry Research Laboratory, 12 Mansfield Road, Oxford, OX1 3TA U.K.

\* email [n.r.cameron@durham.ac.uk](mailto:n.r.cameron@durham.ac.uk), [ben.davis@chem.ox.ac.uk](mailto:ben.davis@chem.ox.ac.uk)

## Table of Contents

|                                                                                                                                |           |
|--------------------------------------------------------------------------------------------------------------------------------|-----------|
| <b>General Experimental Details</b> .....                                                                                      | <b>2</b>  |
| <b>Instrumentation</b> .....                                                                                                   | <b>2</b>  |
| <b>Synthetic Procedures</b> .....                                                                                              | <b>3</b>  |
| <i>N</i> -(2-Hydroxyethyl)-2-methacrylamide (HEMAm).....                                                                       | 3         |
| 3,4,5-Tri- <i>O</i> -Acetyl-2-Azido-2-Deoxygalactopyranosyl Nitrate.....                                                       | 3         |
| 3,4,5-Tri- <i>O</i> -Acetyl-2-Azido-2-Deoxygalactose.....                                                                      | 4         |
| 3,4,6-Tri- <i>O</i> -Acetyl-2-Azido-2-Deoxy- <i>D</i> -Galactopyranosyl Trichloroacetimidate (1).....                          | 5         |
| 3,4,6-Tri- <i>O</i> -Acetyl-2-Azido-2-Deoxy- <i>D</i> -Galactopyranosyloxyethyl Methacrylamide.....                            | 5         |
| 3,4,6-Tri- <i>O</i> -Acetyl-2- <i>N</i> -Acetamido-2-Deoxy- $\alpha$ - <i>D</i> -Galactopyranosyl-oxyethyl Methacrylamide..... | 5         |
| 2- <i>N</i> -Acetamido-2-Deoxy- $\alpha$ - <i>D</i> -Galactopyranosyloxyethyl Methacrylamide (2).....                          | 6         |
| RAFT Polymerisation of Monomer 2.....                                                                                          | 7         |
| Statistical Copolymers of 2 and PEGMA.....                                                                                     | 7         |
| Glyconanoparticle Synthesis.....                                                                                               | 8         |
| Preparation of Asialo-Bovine Submaxillary Mucin.....                                                                           | 9         |
| <b>Nanoparticle Characterisation</b> .....                                                                                     | <b>9</b>  |
| <b>References</b> .....                                                                                                        | <b>11</b> |

## General Experimental Details

All chemicals were used without further purification unless stated otherwise. Ceric ammonium nitrate (CAN) (>98 %), sodium azide, diisopropylethylamine (DIPEA) (>99 %), trichloroacetonitrile (98 %), 2-hydroxyethyl methacrylate (99+ %), acetic anhydride, 4-(N,N-dimethylamino)pyridine (DMAP) (99+ %), sodium borohydride (> 98 %), potassium carbonate, poly(ethylene glycol) methyl ether methacrylate ( $M_n = 300$ ; PEGMA), 4,4'-azobis(4-cyanovaleric acid) (ACVA) and bovine submaxillary mucin (BSM) were purchased from Sigma Aldrich. 3,4,6-Tri-*O*-acetyl galactal (99 %) was purchased from Carbosynth. Thiophenol (> 99 %) was purchased from Fluka. 1,2-bis(diphenylphosphino)ethanetriphenylphosphine (DPPE) and hydrogen tetra-chloroaurate (> 99.9 %, 49 % Au by mass) were purchased from Alfa Aesar. Solvents were purchased from Fischer Scientific and dried by passage through two alumina columns using an Innovative Technology Inc. solvent purification system and stored under N<sub>2</sub>. TLC was performed on aluminium-backed silica plates (Merck), with visualisation using H<sub>2</sub>SO<sub>4</sub> (5 %) in ethanol. 2-Hydroxyethyl methacrylate was passed through a short column of basic alumina in order to remove MEHQ inhibitor prior to polymerisation. Flash column chromatography was performed using a Biotage SP1 automated purification system using pre-packed silica columns. (4-cyanopentanoic acid)-4-dithiobenzoate (CPADB) was synthesised according to a previously described procedure<sup>1</sup>; analytical data were in agreement with literature values.

## Instrumentation

NMR spectra were recorded on a Varian Inova-700 spectrometer at 700MHz (<sup>1</sup>H) and 176MHz (<sup>13</sup>C), a Varian Inova 500 spectrometer at 499.87 (<sup>1</sup>H) and 125.67 MHz (<sup>13</sup>C, <sup>1</sup>H decoupled at 500 MHz) or a Bruker Avance 400 spectrometer at 400.13 MHz (<sup>1</sup>H) or 100.26 MHz (<sup>13</sup>C, <sup>1</sup>H decoupled at 400 MHz), at ambient temperature in CDCl<sub>3</sub>, DMSO, D<sub>2</sub>O or MeOD. NMR spectra were analysed using MestReNova v6.04 software and referenced internally to the protons of the residual solvent. IR spectra were recorded on a Nicolet Nexus FT-IR spectrometer as thin films on KBr discs cast from a suitable solvent. Mass spectral analyses were performed on a Thermal-Finnigan LTQ using a positive or negative ionisation electrospray mode. Elemental analysis was conducted on an Exeter Analytical E-440 elemental analyser. SEC was performed using a triple detection method (with angular correction) and measurements were performed on a Viscotek TDA 301 triple detection SEC fitted with two (300 x 7.5 mm) GMPWxl methacrylate-based mixed bed columns with an exclusion limit of 5,107 g mol<sup>-1</sup>, having refractive index, viscometer and RALLS detectors. The eluent was DMF with added LiBr salt at a flow rate of 1.0 ml min<sup>-1</sup>. Thermogravimetric analyses were performed on a Perkin Elmer Pyris 1 TGA under argon gas; heating from 20 °C to 800 °C at 10 °C min<sup>-1</sup>. Dynamic light scattering measurements were acquired using a Brookhaven Instruments 90 Zeta-Plus particle size analyser; samples were passed through a 0.22 µm

syringe filter prior to analysis. Samples for TEM analysis were prepared by deposition of a drop of the particle solution on to a carbon-coated copper grid and the excess solution removed using filter paper, leaving a thin film of the particles. The samples were imaged using a Hitachi H7600 microscope.

## Synthetic Procedures

### *N*-(2-Hydroxyethyl)-2-methacrylamide (HEMAm)

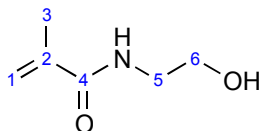

*N*-(2-hydroxyethyl)-2-methacrylamide (HEMAm) was prepared according to the method described by Chan et al.<sup>2</sup> Freshly distilled methacryloyl chloride (1.30 cm<sup>3</sup>, 13.4 mmol) was dissolved in anhydrous dry chloroform (15 cm<sup>3</sup>) and added slowly to a solution of ethanolamine (1.62 cm<sup>3</sup>, 26.8 mmol) at 0 °C in anhydrous chloroform (20 cm<sup>3</sup>). The reaction was stirred for a further 2 h at 0 °C, after which the precipitated salt was removed by filtration, and the solvent removed *in vacuo* to yield crude HEMA as a colourless oil. This was dissolved in chloroform and stirred overnight with basic alumina. After filtration, the solvent was removed *in vacuo* to give the final product as a pale yellow oil, which was stored with BHT at ~4 °C in order to prevent unwanted polymerisation (1.50 g, 11.4 mmol, 90 %). <sup>1</sup>H NMR (400 MHz, CDCl<sub>3</sub>): δ <sup>1</sup>H NMR (400 MHz, CDCl<sub>3</sub>) δ 6.25 (s, 1H, NH), 5.68 (s, 1H, H-1, E to CH<sub>3</sub>-C=C), 5.35 (s, 1H, H-1, Z to CH<sub>3</sub>-C=C), 3.73–3.69 (m, 2H, H-5), 3.43 (dd, *J* = 5.5Hz, 10.2Hz, 2H, H-6), 2.70 (s, 2H, H-3). <sup>13</sup>C NMR (101 MHz, CDCl<sub>3</sub>): δ 168.70 (C-4), 140.06 (C-2), 119.37 (C-1), 62.20 (C-6), 39.44 (C-5), 18.64 (C-3). LR-MS (ES<sup>+</sup>) *m/z* requires 152.1, found 152.1 (M+Na)<sup>+</sup>.

### **3,4,5-Tri-*O*-Acetyl-2-Azido-2-Deoxygalactopyranosyl Nitrate**

A solution of tri-*O*-acetyl galactal (12.0 g, 44 mmol) in acetonitrile (250 cm<sup>3</sup>) was cooled to 0 °C and transferred by cannula into a cooled (-20 °C) mixture of NaN<sub>3</sub> (4.3 g, 66 mmol) and ceric ammonium nitrate (87 g, 158 mmol). The reaction mixture was vigorously stirred under N<sub>2</sub> at -20 °C for 12 h. Upon reaction completion as determined by TLC, the mixture was diluted with ethyl acetate (150 cm<sup>3</sup>), and washed with cold water (5 x 50 cm<sup>3</sup>) and brine subsequently. The solution was dried over anhydrous Na<sub>2</sub>SO<sub>4</sub>, filtered and the solvent removed *in vacuo*. The colourless oil (15.5 g) was purified by flash column chromatography (EtOAc/hexane 1:1). A mixture of  $\alpha$ ,  $\beta$  and talo stereoisomers was isolated in a ratio of 1:0.7:0.2 (as determined by <sup>1</sup>H NMR spectroscopy), (13.3g, 35.3 mmol, 80 %). The individual stereoisomers were not isolated although, for clarity, NMR data for each is reported separately.  $\nu_{\max}$ (CH<sub>2</sub>Cl<sub>2</sub>/cm<sup>-1</sup>) 3476, 2959, 2119 (N<sub>3</sub>), 1815, 1747, 1660, 1372, 1224 cm<sup>-1</sup>;  $\alpha$  <sup>1</sup>H NMR (700MHz,

CDCl<sub>3</sub>):  $\delta$  6.36 (d,  $J_{1,2} = 4.2\text{Hz}$ , 1H, H-1), 5.50 (dd,  $J_{4,5} = 0.7\text{Hz}$ ,  $J_{4,3} = 3.1\text{Hz}$ , 1H, H-4), 5.26 (1H, dd,  $J_{3,2} = 11.3\text{Hz}$ ,  $J_{3,4} = 3.1\text{Hz}$ , 1H, H-3), 4.14 (m, 1H, H-2), 5.24 (dd,  $J_{3,2} = 11.5\text{Hz}$ ,  $J_{3,4} = 2.9\text{Hz}$ , 1H, H-3), 4.37 (td,  $J_{5,4} = 0.7\text{Hz}$ ,  $J_{5,6} = 6.2\text{Hz}$ , 1H, H-5), 4.16–4.11 (m, 3H, H-2, H-6), 2.12–2.03 (m, 9H, 3CH<sub>3</sub>); <sup>13</sup>C NMR (126MHz, CDCl<sub>3</sub>):  $\delta$  169.4 – 170.3 (C=O acyl), 97.1 (C-1), 69.7 (C-5), 69.0 (C-3), 66.5 (C-4), 61.1 (C-6), 56.3 (C-2), 20.8–20.3 (3 x CH<sub>3</sub>);  **$\beta$**  <sup>1</sup>H NMR (700MHz, CDCl<sub>3</sub>):  $\delta$  5.60 (d,  $J_{1,2} = 8.8\text{Hz}$ , 1H, H-1), 5.40 (dd,  $J_{4,3} = 3.3\text{Hz}$ ,  $J_{4,5} = 0.8\text{Hz}$ , 1H, H-4), 4.97 (dd,  $J_{3,4} = 3.3\text{Hz}$ ,  $J_{3,2} = 10.6\text{Hz}$ , 1H, H-3), 4.15–4.11 (m, 2H, H-6), 4.05 (td,  $J_{5,4} = 0.8\text{Hz}$ ,  $J_{5,6} = 6.6\text{Hz}$ , 1H, H-5), 3.86 (dd,  $J_{2,3} = 10.6\text{Hz}$ ,  $J_{1,2} = 8.8\text{Hz}$ , 1H, H-2), 2.12–2.03 (m, 9H, 3x CH<sub>3</sub>); <sup>13</sup>C NMR (126MHz, CDCl<sub>3</sub>):  $\delta$  169.4 – 170.5 (C=O) 98.4 (C-1), 72.0 (C-5), 71.9 (C-3), 66.3 (C-4), 60.9 (C-6), 57.7 (C-2), 20.8–20.3 (CH<sub>3</sub>); **talo** <sup>1</sup>H NMR (500MHz, CDCl<sub>3</sub>):  $\delta$  6.21 (d,  $J_{1,2} = 1.2\text{Hz}$ , 1H, H-1), 5.48–5.44 (m, 1H, H-4), 5.30 (dd,  $J_{3,2} = 3.7\text{Hz}$ ,  $J_{3,4} = 4.8\text{Hz}$ , 1H, H-3), 4.19 (td,  $J_{5,4} = 5.4\text{Hz}$ ,  $J_{5,6} = 11.8\text{Hz}$ , 1H, H-5), 4.16–4.11 (m, 2H, H-6), 4.01 (1H, m, H-2), 2.12–2.03 (m, 9H, 3 x CH<sub>3</sub>); <sup>13</sup>C NMR (126MHz, CDCl<sub>3</sub>):  $\delta$  169.4 – 170.5 (C=O), 97.9 (C-1), 67.4 (C-3), 65.0 (C-4), 61.3 (C-6), 60.7 (C-5), 55.4 (C-2), 20.8–20.3 (3 x CH<sub>3</sub>). LRMS (ES<sup>+</sup>) requires m/z 399.0, found 399.0 (M+Na)<sup>+</sup>; Anal. calcd. for C<sub>12</sub>H<sub>16</sub>N<sub>4</sub>O<sub>10</sub>: C 38.30, H 4.29, N 14.55; found: C 38.42, H 4.31, N 14.47.

### 3,4,5-Tri-O-Acetyl-2-Azido-2-Deoxygalactose

A solution of azidonitrates (13g, 35.3mmol) in anhydrous acetonitrile (100 ml) at 0 °C was treated with DIPEA (7.6ml, 42.4mmol) and thiophenol (4.4ml, 42.4mmol). The reaction mixture was stirred at 0 °C for 1 h, after which the solvent was removed *in vacuo*. The dark brown residue was then treated with hexane and the solvent decanted in order to remove a large proportion of the diphenyl disulphide byproduct. The remaining oil was purified by flash column chromatography (EtOAc:hexane 1:1) to give a pale yellow viscous oil (8.2g, 24.7 mmol, 72 %). A mixture of  $\alpha$  and  $\beta$  anomers was isolated in a ratio of 0.5:1, as determined by <sup>1</sup>H NMR spectroscopy (the talo isomer was separated by column chromatography). The individual anomers were not isolated although, for clarity, NMR data for each is reported separately.  $\nu_{\text{max}}$ (CH<sub>2</sub>Cl<sub>2</sub>/cm<sup>-1</sup>) 3642 (OH) 2118 (N<sub>3</sub>), 1743 (C=O).  **$\alpha$**  <sup>1</sup>H NMR (700 MHz, CDCl<sub>3</sub>):  $\delta$  5.45 (dd,  $J_{4,5} = 1.4\text{Hz}$ ,  $J_{4,3} = 3.3\text{Hz}$ , 1H, H-4), 5.42 (t,  $J_{1,\text{OH}} = 3.4\text{Hz}$ ,  $J_{1,2} = 3.4\text{Hz}$ , 1H, H-1), 5.39 (dd,  $J_{3,4} = 3.2\text{Hz}$ ,  $J_{3,2} = 11.1\text{Hz}$ , 1H, H-3), 4.45 (td,  $J_{5,4} = 0.9\text{Hz}$ ,  $J_{5,6} = 6.5\text{Hz}$ , 1H, H-5), 4.08 (m, 2H, H-6), 3.74 (dd,  $J_{2,1} = 3.4\text{Hz}$ ,  $J_{2,3} = 11.1\text{Hz}$ , 1H, H-2), 3.17 (d,  $J_{\text{OH-1}} = 3.5\text{Hz}$ , 1H, OH), 2.14–2.04 (m, 9H, 3 x CH<sub>3</sub>); <sup>13</sup>C NMR (176 MHz, CDCl<sub>3</sub>):  $\delta$  170.4–169.8, (C=O), 92.39 (C-1), 68.30 (C-3), 67.64 (C-4), 66.67 (C-5), 61.74 (C-6), 58.01 (C-2), 20.6–20.5 (3 x CH<sub>3</sub>).  **$\beta$**  <sup>1</sup>H NMR (700 MHz, CDCl<sub>3</sub>): 5.33 (dd,  $J_{4,5} = 1.0$ ,  $J_{4,3} = 3.4$ , 1H, H-4), 4.81 (dd,  $J_{3,4} = 3.4$ ,  $J_{3,2} = 10.9$ , 1H, H-3), 4.70 (dd,  $J_{1-\text{OH}} = 5.3$ ,  $J_{1,2} = 7.9$ , 1H, H-1), 4.12 (d,  $J_{6,5} = 6.5$ , 2H, H-6), 3.90 (td,  $J_{5,4} = 1.2$ ,  $J_{5,6} = 6.5$ , 1H, H-5), 3.72 (d,  $J_{\text{OH-1}} = 5.4$ , 1H, OH), 3.65 (dd,  $J_{2,1} = 7.9$ ,  $J_{2,3} = 10.9$ , 1H, H-2), 2.15–2.04 (m, 9H, 3 x CH<sub>3</sub>); <sup>13</sup>C NMR (176 MHz, CDCl<sub>3</sub>):  $\delta$  170.4–169.8 (C=O), 96.44 (C-1), 71.14 (C-3), 70.99 (C-5), 66.41 (C-4), 61.97 (C-2), 61.54 (C-6), 20.6–20.5 (CH<sub>3</sub>). LR-MS (ES<sup>+</sup>) m/z requires 354.2, found 354.0 (M + Na)<sup>+</sup>.

### **3,4,6-Tri-O-Acetyl-2-Azido-2-Deoxy-D-Galactopyranosyl Trichloroacetimidate (1)**

3,4,5-Tri-O-acetyl-2-azido-2-deoxygalactose (8.1 g, 24.4 mmol) was dissolved in anhydrous dichloromethane (100 cm<sup>3</sup>), cooled to 0 °C and treated with K<sub>2</sub>CO<sub>3</sub> (17 g, 122.2 mmol) and trichloroacetonitrile (35 cm<sup>3</sup>, 244 mmol). The reaction mixture was allowed to warm to room temperature and stirred for 12 h. The suspension was filtered through a pad of Celite and washed with anhydrous dichloromethane. The filtrate was concentrated *in vacuo*, and the dark brown oily residue was purified by flash chromatography on silica gel (EtOAc/hexane 1:1) to give a pale yellow viscous oil (7.6 g, 16.0 mmol, 62 %). A mixture of  $\alpha$  and  $\beta$  anomers was isolated in a ratio of 1:1, as determined by <sup>1</sup>H NMR spectroscopy.  $\nu_{\text{max}}$ (CH<sub>2</sub>Cl<sub>2</sub>/cm<sup>-1</sup>) 3318 (NH), 2962 (sp<sup>3</sup> CH str), 2116 (N<sub>3</sub>), 1750 (C=O), 1675 (NHC=O), 1370, 1224, 1071; **1 $\alpha$**  <sup>1</sup>H NMR (700 MHz, CDCl<sub>3</sub>):  $\delta$  8.78 (s, 1H, NH), 6.50 (d,  $J_{1,2}$  = 3.6Hz, 1H, H-1), 5.53 (dd,  $J_{4,5}$  = 1.3Hz,  $J_{4,3}$  = 3.2Hz, 1H, H-4), 5.37, (dd,  $J_{3,4}$  = 3.2Hz,  $J_{3,2}$  = 11.1Hz, 1H, H-3) 4.17–4.10 (m, 3H, H-5), 4.05 (dd,  $J$  = 6.7Hz, 11.4Hz, 1H, H-2), 2.16 (s, 3H, CH<sub>3</sub>), 2.06 (s, 3H, CH<sub>3</sub>), 1.99 (s, 3H, CH<sub>3</sub>). <sup>13</sup>C (176MHz, CDCl<sub>3</sub>):  $\delta$  C 169.9–170.5 (C=O), 160.9 (C-7), 96.9 (C-1), 90.8 (C-8), 69.3 (C-5), 68.9 (C-3), 67.2 (C-4), 61.4 (C-6), 57.3 (C-2), 20.8 (CH<sub>3</sub>). **1 $\beta$**  <sup>1</sup>H NMR (700 MHz, CDCl<sub>3</sub>):  $\delta$  8.78 (s, 1H, NH), 5.69 (d,  $J_{1,2}$  = 8.5Hz, 1H, H-1), 5.39 (dd,  $J_{4,5}$  = 1.1Hz,  $J_{4,3}$  = 3.4Hz, 1H, H-4), 4.90 (dd,  $J_{3,4}$  = 3.4Hz,  $J_{3,2}$  = 10.8Hz, 1H, H-3), 4.40 (td,  $J_{5,4}$  = 1.1Hz,  $J_{5,6}$  = 6.6Hz, 1H, H-5), 4.03–4.00 (m, 2H, H-6), 3.94 (dd,  $J_{2,3}$  = 8.5Hz,  $J_{2,1}$  = 10.8Hz, 1H, H-2), 2.17 (s, 3H, CH<sub>3</sub>), 2.06 (s, 3H, CH<sub>3</sub>), 2.02 (s, 3H, CH<sub>3</sub>); <sup>13</sup>C NMR (176MHz, CDCl<sub>3</sub>):  $\delta$  169.9–170.5 (C=O), 160.9 (C-7), 94.7 (C-1), 90.5 (C-8), 71.9 (C-5), 71.5 (C-3), 66.2 (C-4), 61.0 (C-6), 60.6 (C-2), 20.8 (CH<sub>3</sub>). LR-MS (ES<sup>+</sup>) *m/z* requires 497.0, found 497.0 (M + Na)<sup>+</sup>; Anal. calcd. for C<sub>12</sub>H<sub>17</sub>N<sub>3</sub>O<sub>8</sub>: C 35.35, H 3.60, N 11.78; found: C 35.21, H 3.56, N 11.54.

### **3,4,6-Tri-O-Acetyl-2-Azido-2-Deoxy-D-Galactopyranosyloxyethyl Methacrylamide**

A solution of trichloroacetimidate **1** (5.8 g, 12.1 mmol), HEMAm (1.8 g, 13.9 mmol) with 3 Å molecular sieves in diethyl ether:dichloromethane (2:1), was cooled to -20 °C under N<sub>2</sub>. TMSOTf (1.1 cm<sup>3</sup>, 6.05 mmol) was added and the reaction stirred for 30 min., after which time **1** had been consumed (as determined by TLC). The reaction was quenched with Et<sub>3</sub>N (0.85 cm<sup>3</sup>, 6.1 mmol), stirred for a further 15 min., filtered to remove Et<sub>3</sub>N.HCl and then concentrated *in vacuo*. The crude product was purified by flash column chromatography (EtOAc:hexanes, 1:1) to give a pale yellow oil (4.3 g, 9.7 mmol, 80 %). A  $\alpha$ : $\beta$  ratio of 1:1 was determined by <sup>1</sup>H NMR spectroscopy. HRMS *m/z* (ES)<sup>+</sup>: Found 465.1589 (M+Na)<sup>+</sup>. C<sub>18</sub>H<sub>26</sub>N<sub>4</sub>NaO<sub>9</sub> requires *m/z* 465.1592. Anal. calcd. for C<sub>18</sub>H<sub>26</sub>N<sub>4</sub>O<sub>9</sub>: C 48.87, H 5.92, N 12.66, found C 49.11, 5.94, N 12.57.

### **3,4,6-Tri-O-Acetyl-2-N-Acetamido-2-Deoxy- $\alpha$ -D-Galactopyranosyl-oxyethyl Methacrylamide**

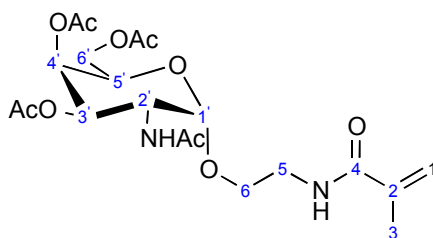

To a solution of 3,4,6-tri-*O*-acetyl-2-azido-2-deoxy-*D*-galactopyranosyloxyethyl methacrylamide (4.2 g, 9.5 mmol) in dichloromethane (60 cm<sup>3</sup>) was added DPPE (3.0 g, 7.6 mmol). The reaction was stirred for 1 h after which Ac<sub>2</sub>O (9 cm<sup>3</sup>, 95 mmol), DMAP (0.23g, 1.9 mmol) and Et<sub>3</sub>N (19 cm<sup>3</sup>, 142.5 mmol) were added. The reaction was stirred for a further 3 h until the intermediate DPPE adduct had been consumed and the product spot appeared by TLC (toluene:acetone, 1:1, *R<sub>f</sub>* 0.33). The reaction mixture was filtered to remove precipitated bis(phosphine oxide) and the solvent then removed *in vacuo*. The crude residue was purified by flash column chromatography (toluene: acetone, 1:1) to give the separate anomers (**α**: 1.91g, 4.2 mmol, 55 %) and (**β**: 1.7g, 3.7 mmol, 40 %) as clear, colourless oils. **α** <sup>1</sup>H NMR (400 MHz, CDCl<sub>3</sub>): δ 6.29 – 6.20 (m, 1H, NH), 6.07 (d, *J*<sub>NH,2'</sub> = 8.9Hz, 1H, NHAc), 5.72 (s, 1H, H-1, E to CH<sub>3</sub>-C=C), 5.40 (s, 1H, H-1, Z to CH<sub>3</sub>-C=C, ov m, 1H, H-4'), 5.15 (dd, *J*<sub>3',4'</sub> = 3.3Hz, *J*<sub>3',2'</sub> = 11.4Hz, 1H, H-3'), 4.92 (d, *J*<sub>4',3'</sub> = 3.6Hz, 1H, H-1'), 4.61 (ddd, *J*<sub>2',1'</sub> = 3.6Hz, *J*<sub>2',NH</sub> = 9.5Hz, *J*<sub>3',2'</sub> = 11.4Hz, 1H, H-2'), 4.20 (t, *J*<sub>5',6'</sub> = 6.3Hz 1H, H-5') 4.16-4.04 (m, 3H, H-5a, H-6'), 3.79 (ddd, *J*<sub>6a,5b</sub> = 4.2Hz, *J*<sub>6a,5a</sub> = 6.7Hz, *J*<sub>6a,6b</sub> = 8.3Hz, 1H, H-6a), 3.72-3.65 (m, 1H, H-5b), 3.63 – 3.47 (m, 1H, H-6b), 2.19 (s, 3H, CH<sub>3</sub>), 2.06 (s, 3H, CH<sub>3</sub>), 2.01 (s ov, 6H, H-3, NHAc). <sup>13</sup>C NMR (126 MHz, CDCl<sub>3</sub>): δ 171.18, 170.73, 170.52, 170.31, 167.42 (5 x C=O), 136.18 (C-2), 126.38 (C-1), 98.04 (C-1'), 68.60 (C-3'), 67.32 (C-5'), 67.15 (C-4'), 65.98 (C-6), 61.23 (C-5), 62.15 (C-6'), 47.78 (C-2'), 23.46 (NHAc), 20.97 (CH<sub>3</sub>), 20.89 (CH<sub>3</sub>), 20.87 (CH<sub>3</sub>), 18.54 (C-3).

## 2-*N*-Acetamido-2-Deoxy-**α**-*D*-Galactopyranosyloxyethyl Methacrylamide (**2**)

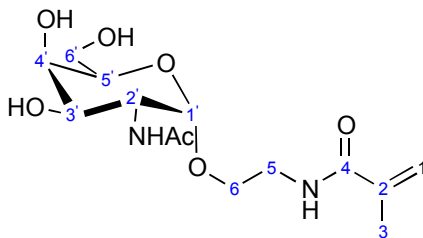

To a stirred solution of 3,4,6-tri-*O*-acetyl-2-*N*-acetamido-2-deoxy-**α**-*D*-galactopyranosyloxyethyl methacrylamide (1.0 g, 2.2 mmol) in anhydrous methanol (30 cm<sup>3</sup>) was added K<sub>2</sub>CO<sub>3</sub> (0.36 g, 2.6 mmol).

The reaction was quenched with cation exchange resin (DOWEX 50W x 2-200) after 20 min. following full deprotection of the sugar as determined by TLC. The neutral solution was stirred for a further 20 min. before filtration through Celite to remove the resin. The solution was concentrated *in vacuo* and the residue then purified by flash column chromatography (CH<sub>3</sub>Cl:MeOH, 6:1). The fully deprotected alpha sugar was isolated as a white powder (0.47 g, 1.4 mmol, 65 %).  $v_{\max}(\text{MeOH}/\text{cm}^{-1})$  3346, 3016, 2952, 1748, 1721 (C=O HEMA), 1664, 1557. <sup>1</sup>H NMR (700 MHz, CD<sub>3</sub>OD):  $\delta$  5.69 (s, 1H, H-1, E to CH<sub>3</sub>-C=C), 5.38 (s, 1H, H-1, Z to CH<sub>3</sub>-C=C), 4.79 (d,  $J_{1,2'} = 3.6\text{Hz}$ , 1H, H-1'), 4.26 (dd,  $J_{2,1'} = 3.60\text{Hz}$ ,  $J_{2,3'} = 10.9\text{Hz}$ , 1H, H-2'), 3.84 (d,  $J_{4,3'} = 2.9\text{Hz}$ , 1H, H-4'), 3.78 (t,  $J_{5,6'} = 6.3\text{Hz}$ , 1H, H-5'), 3.76 – 3.69 (m, 3H, H-5a, H-6'), 3.67 (dd,  $J_{3,4'} = 4.8\text{Hz}$ ,  $J_{3,2'} = 11.2\text{Hz}$ , 1H, H-3'), 3.57 (ddd,  $J_{6a,5b} = 4.5\text{Hz}$ ,  $J_{6a,5a} = 6.5\text{Hz}$ ,  $J_{6a,6b} = 13.6\text{Hz}$ , H, H-6a), 3.52 (ddd,  $J_{5b,6a} = 4.5\text{Hz}$ ,  $J_{5b,6b} = 6.2\text{Hz}$ ,  $J_{5b,5a} = 10.7\text{Hz}$ , 1H, H-5b), 3.38 (ddd,  $J = J_{6b,5a} = 4.2\text{Hz}$ ,  $J_{6b,5b} = 5.9\text{Hz}$ ,  $J_{6b,6a} = 13.3\text{Hz}$ , 1H, H-6b), 1.97 (s, 3H, NHAc), 1.94 (s, 3H, H-3). <sup>13</sup>C NMR (176 MHz, CD<sub>3</sub>OD):  $\delta$  172.45 (NHC=O), 170.03 (C-4), 139.97 (C-2), 119.07 (C-1), 97.88 (C-1'), 71.28 (C-5'), 68.95 (C-4'), 68.56 (C-3'), 66.65 (C-6), 61.47 (C-5), 49.98 (C-2'), 38.95, 21.31 (NHAc), 17.36 (C-3). HRMS  $m/z$  (ES)<sup>+</sup>: Found 355.1479 (M+Na)<sup>+</sup>. C<sub>14</sub>H<sub>23</sub>N<sub>2</sub>NaO<sub>8</sub> requires  $m/z$  355.1481.

## RAFT Polymerisation of Monomer 2

To a solution of **2** ( $5.0 \times 10^{-2}$  g, 0.15 mmol) in DMF:H<sub>2</sub>O (7:3) (1 cm<sup>3</sup>) in a Schlenk tube were added solutions of CPADB (50  $\mu$ l, 0.057 M,  $3.0 \times 10^{-3}$  mmol) and ACVA (26  $\mu$ l, 0.057 M,  $1.5 \times 10^{-3}$  mmol), also in DMF:H<sub>2</sub>O (7:3). The tube was sealed and the solution degassed by 5 freeze-pump-thaw cycles, back-filled with N<sub>2</sub> and placed in a water bath at 70 °C. After 24 h a further portion of ACVA was added (13  $\mu$ l, 0.057 M,  $7.5 \times 10^{-4}$  mmol) after which the flask was resealed, purged with N<sub>2</sub> and the reaction heated at 70 °C for another 24 h. The polymerisation was quenched after 48 h by immersion in ice water. A crude sample was taken for <sup>1</sup>H NMR analysis and the remainder of the solution was dialyzed against high purity water (3 x 2L) and the purified polymer solution lyophilized to yield a pale pink solid.

## Statistical Copolymers of 2 and PEGMA

**Table S1: Quantities Used in the Synthesis of Statistical Copolymers of 2 and PEGMA<sup>a</sup>**

| Sample <sup>b</sup>                | PEGMA |      | [CPADB] |           | [ACVA] |           | [M]/<br>[CTA] | [CTA/<br>Init.] |
|------------------------------------|-------|------|---------|-----------|--------|-----------|---------------|-----------------|
|                                    | g     | mmol | mg      | $\mu$ mol | mg     | $\mu$ mol |               |                 |
| PEG <sub>40</sub> Tn <sub>10</sub> | 0.18  | 0.60 | 4.2     | 15        | 2.1    | 7.5       | 50            | 2               |
| PEG <sub>25</sub> Tn <sub>25</sub> | 0.045 | 0.15 | 1.7     | 6.0       | 0.8    | 3.0       | 50            | 2               |
| PEG <sub>80</sub> Tn <sub>20</sub> | 0.18  | 0.60 | 2.0     | 7.5       | 1.1    | 3.8       | 100           | 2               |
| PEG <sub>50</sub> Tn <sub>50</sub> | 0.045 | 0.15 | 0.8     | 3.0       | 0.4    | 1.5       | 100           | 2               |

<sup>a</sup> Quantity of **2** = 0.05g (0.15 mmol) throughout, PEGMA = poly(ethyleneglycol) methyl ether methacrylate, Tn = Tn-antigen glycan monomer **2**, M = monomer, CTA = chain transfer agent (CPADB), Init. = initiator (ACVA); <sup>b</sup> PEG = poly(ethyleneglycol) methyl ether methacrylate, Tn = Tn-antigen glycan monomer **2**, subscript = target degree of polymerization.

Statistical copolymers were synthesised using quantities detailed in Table S1. Typically (entry 1), **2** (0.05 g, 0.15 mmol) and poly(ethyleneglycol) methyl ether methacrylate (PEGMA) (0.18 g, 0.60 mmol) were dissolved in DMF:H<sub>2</sub>O (7:3) to give a 0.5M solution. CPADB (4.2x10<sup>-3</sup> g, 0.015 mmol) and ACVA (2.1x10<sup>-3</sup>, 7.5x10<sup>-3</sup> mmol) were added as solutions in DMF:H<sub>2</sub>O (7:3), the mixture degassed by five freeze-pump-thaw cycles and subsequently backfilled with N<sub>2</sub>. The flask was placed in a water bath at 70 °C for 24 h. After 24 h a further portion of ACVA was added (13 µl, 0.057 M, 7.5x10<sup>-4</sup> mmol) after which the flask was resealed, purged and the reaction then heated at 70 °C for an additional 24 h. The polymerisation was quenched after 48 h by immersion in ice water. A sample of the solution was removed for <sup>1</sup>H NMR analysis of the crude reaction mixture and the remainder was dialysed against high purity water (3 x 2L H<sub>2</sub>O) for 24 h. Typical <sup>1</sup>H NMR spectroscopy data are as follows (all are identical except for integration values due to differences in composition). <sup>1</sup>H NMR (700 MHz, D<sub>2</sub>O): δ 7.92-7.18 (br, NH), 4.29-4.14 (br, H-1'), 4.13-3.91 (br, CH<sub>2</sub>OCO), 3.85-3.08 (br m, H-H-2'-H-6', H-5, H-6, PEG-CH<sub>2</sub>, PEG-OCH<sub>3</sub>), 2.05-1.35, (backbone CH<sub>2</sub>, NHAc), 1.17-1.05 (backbone CH<sub>3</sub>).

Molecular weight and composition data for the polymers are given in Table S2.

**Table S2. Data for the Synthesis of Polymers by RAFT Polymerisation**

| Polymer <sup>a</sup>               | Conversion (%) <sup>b</sup> | Yield (%) | <i>M</i> <sub>n, Th</sub> (kDa) <sup>c</sup> | <i>M</i> <sub>n</sub> (kDa) <sup>d</sup> | PDI <sup>d</sup> |
|------------------------------------|-----------------------------|-----------|----------------------------------------------|------------------------------------------|------------------|
| PEG <sub>50</sub>                  | 95                          | 51        | 14.5                                         | 12.2                                     | 1.23             |
| Tn <sub>50</sub>                   | 65                          | 52        | 11.1                                         | 14.2                                     | 1.16             |
| PEG <sub>40</sub> Tn <sub>10</sub> | 99, 95 <sup>e</sup>         | 73        | 15.3                                         | 15.0                                     | 1.12             |
| PEG <sub>25</sub> Tn <sub>25</sub> | 90, 70 <sup>e</sup>         | 59        | 12.9                                         | 16.9                                     | 1.18             |
| PEG <sub>80</sub> Tn <sub>20</sub> | 99, 75 <sup>e</sup>         | 68        | 29.0                                         | 40.4                                     | 1.15             |
| PEG <sub>50</sub> Tn <sub>50</sub> | 99, 75 <sup>e</sup>         | 75        | 27.7                                         | 30.4                                     | 1.18             |

<sup>a</sup> PEG = poly(ethyleneglycol) methyl ether methacrylate, Tn = Tn-antigen glycan monomer **2**, subscript = target degree of polymerization; <sup>b</sup> determined by <sup>1</sup>H NMR spectroscopy by comparison of the integrals of the monomer alkene peaks to a selected polymer peak in the spectrum of the crude polymer; <sup>c</sup> theoretical *M*<sub>n</sub>, at observed conversion, determined from [monomer]<sub>0</sub>: [CTA]<sub>0</sub>; <sup>d</sup> determined by SEC; <sup>e</sup> values refer to copolymer first and second block respectively.

### Glyconanoparticle Synthesis

Glyconanoparticles were synthesized using quantities of reagents detailed in Table S3. Separate solutions of HAuCl<sub>4</sub> (0.5 mM), glycopolymer (5.0 mM) and sodium borohydride (50 mM) were prepared in UHQ water (resistivity < 18.0 M). The HAuCl<sub>4</sub> and glycopolymer solutions were combined and then treated with NaBH<sub>4</sub> solution. An immediate solution colour change from yellow to pale brown was observed in



all cases. Stirring was continued for 2.5 h after which the nanoparticle solutions were purified by centrifugal filtration (Sartorius Vivaspin 15R, MWCO 30 kDa) and washing with UHQ water.

**Table S3. Quantities of Reagents Used in the Preparation of Glyconanoparticles**

| Polymer <sup>a</sup>               | Vol. HAuCl <sub>4</sub> (cm <sup>3</sup> ) <sup>b</sup> | Vol. Poly (cm <sup>3</sup> ) <sup>c</sup> | Polymer (g) | Vol. NaBH <sub>4</sub> (cm <sup>3</sup> ) <sup>d</sup> | Au:poly <sub>e</sub> |
|------------------------------------|---------------------------------------------------------|-------------------------------------------|-------------|--------------------------------------------------------|----------------------|
| Tn <sub>50</sub>                   | 5                                                       | 0.1                                       | 0.0071      | 1.0                                                    | 2.5                  |
| PEG <sub>40</sub> Tn <sub>10</sub> | 5                                                       | 0.1                                       | 0.0075      | 1.0                                                    | 2.5                  |
| PEG <sub>25</sub> Tn <sub>25</sub> | 5                                                       | 0.1                                       | 0.0085      | 1.0                                                    | 2.5                  |
| PEG <sub>80</sub> Tn <sub>20</sub> | 5                                                       | 0.1                                       | 0.02        | 1.0                                                    | 2.5                  |
| PEG <sub>50</sub> Tn <sub>50</sub> | 2.5                                                     | 0.05                                      | 0.0076      | 0.5                                                    | 2.5                  |

<sup>a</sup> PEG = poly(ethyleneglycol) methyl ether methacrylate, Tn = Tn-antigen glycan monomer **3**, subscript = target degree of polymerization; <sup>b</sup> [HAuCl<sub>4</sub>] = 0.5mM; <sup>c</sup> [Polymer] = 5.0mM; <sup>d</sup> [NaBH<sub>4</sub>] = 50mM; <sup>e</sup> Based on Au content of 49% for HAuCl<sub>4</sub>.

### Preparation of Asialo-Bovine Submaxillary Mucin

Bovine submaxillary mucin (BSM) was desialylated following the procedure described by O'Boyle et al.<sup>3</sup> Briefly, BSM was heated in 0.1N sulfuric acid solution for 1 h, dialysed against ultrapure water (3 x 2L) then freeze-dried and stored at -18 °C.

### Nanoparticle Characterisation

TEM images of glyconanoparticle samples are shown in Figure S1.

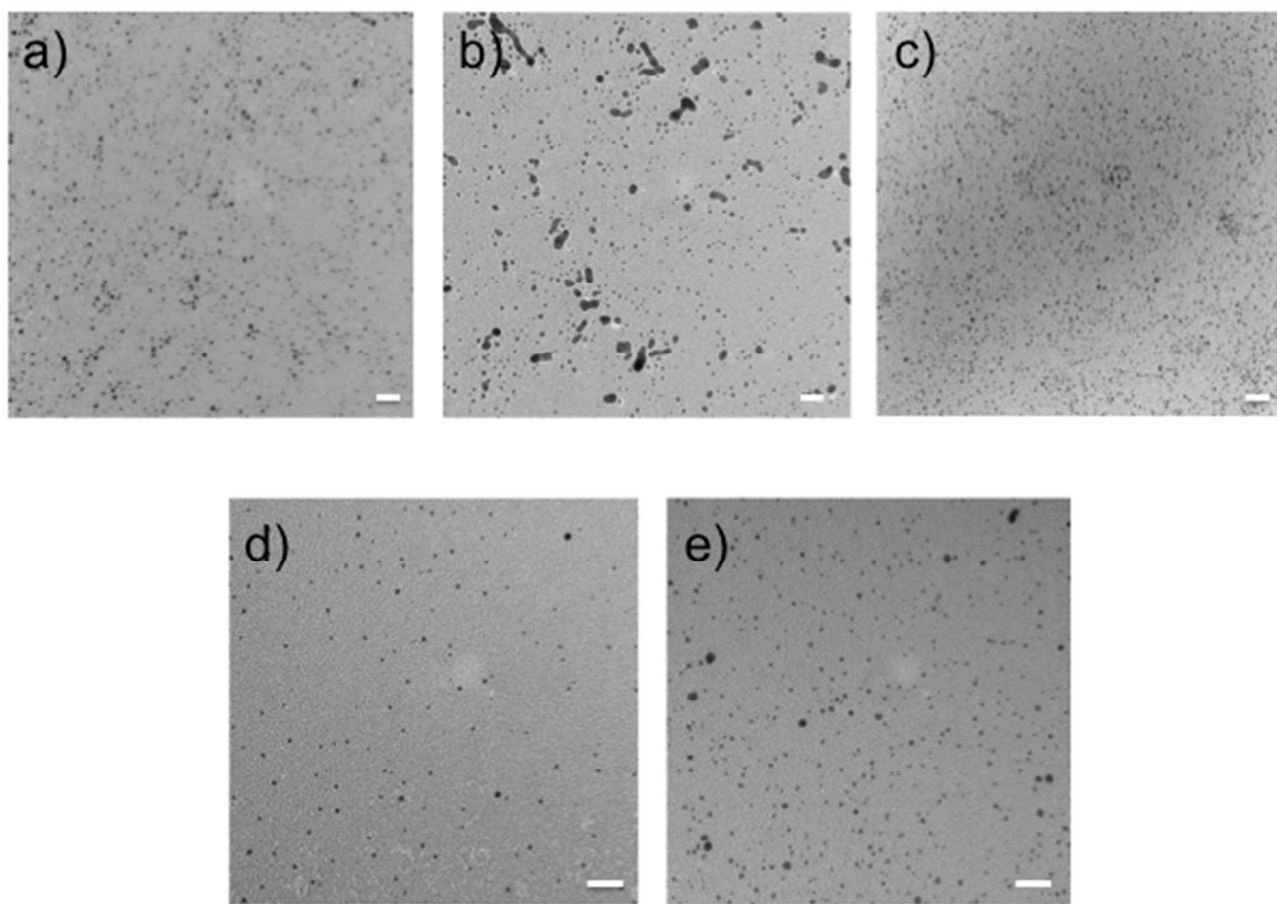

**Figure S1.** TEM images of glyconanoparticle samples prepared with different glycopolymer coronas: a) Tn<sub>50</sub>; b) PEG<sub>40</sub>Tn<sub>10</sub>; c) PEG<sub>25</sub>Tn<sub>25</sub>; d) PEG<sub>80</sub>Tn<sub>20</sub>; e) PEG<sub>50</sub>Tn<sub>50</sub>. PEG = poly(ethyleneglycol) methyl ether methacrylate, Tn = Tn-antigen glycan monomer **2**, subscript = target degree of polymerization. Scale bar = 20 nm.

Dynamic light scattering traces are shown in Figure S2.

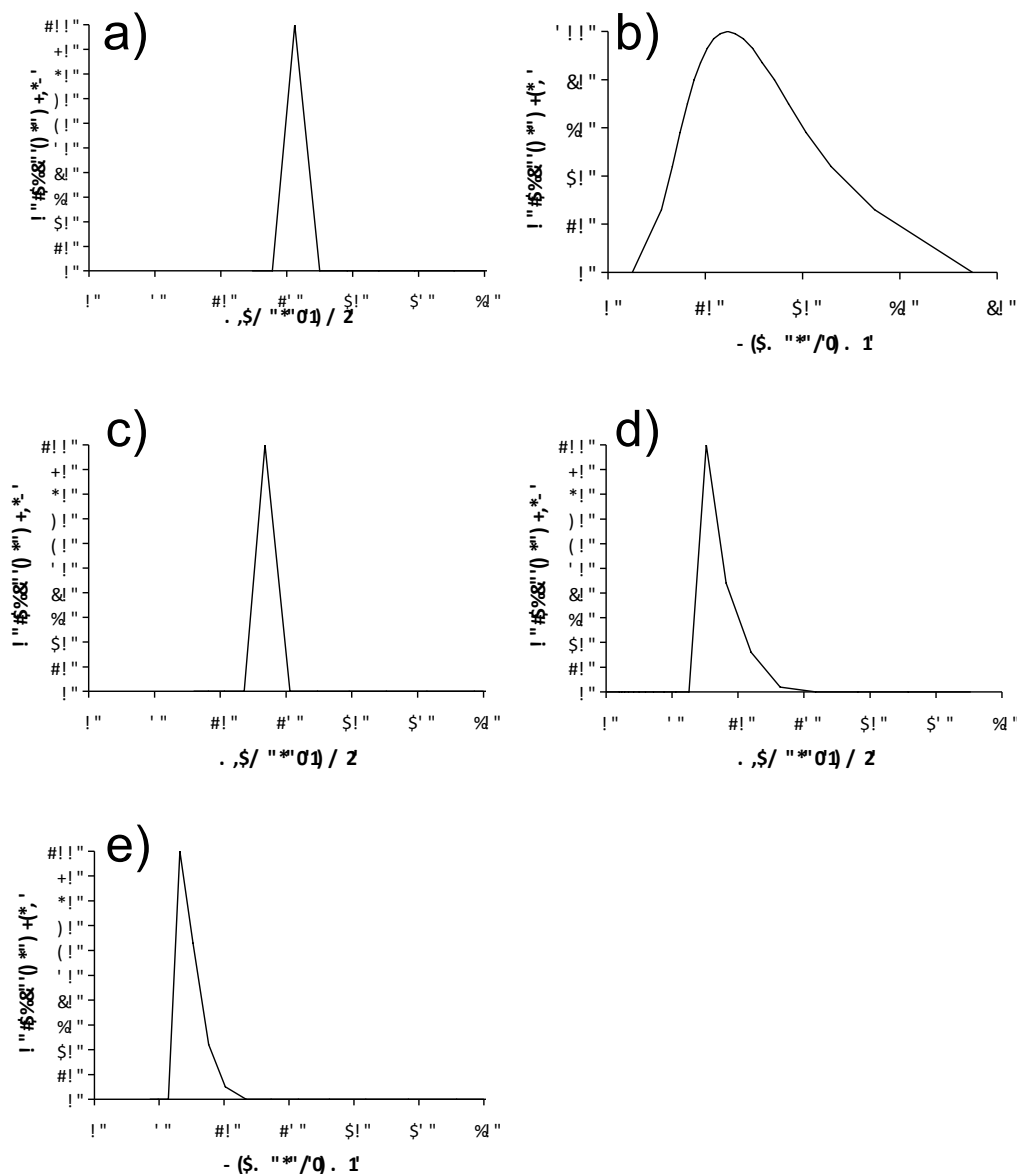

**Figure S2.** Dynamic light scattering traces for glyconanoparticle samples prepared with different glycopolymer coronas: a) Tn<sub>50</sub>; b) PEG<sub>40</sub>Tn<sub>10</sub>; c) PEG<sub>25</sub>Tn<sub>25</sub>; d) PEG<sub>80</sub>Tn<sub>20</sub>; e) PEG<sub>50</sub>Tn<sub>50</sub>. PEG = poly(ethyleneglycol) methyl ether methacrylate, Tn = Tn-antigen glycan monomer **2**, subscript = target degree of polymerization.

## References

- (1) Thang, S. H.; Chong, Y. K.; Mayadunne, R. T. A.; Moad, G.; Rizzardo, E. *Tetrahedron Lett.* **1999**, *40*, 2435.
- (2) Chan, G. Y. N.; Looney, M. G.; Solomon, D. H.; Veluayitham, S. *Aust. J. Chem.* **1998**, *51*, 31.
- (3) O'Boyle, K. P.; Coatsworth, S.; Anthony, G.; Ramirez, M.; Greenwald, E.; Kaleya, R.; Steinberg, J. J.; Dutcher, J. P.; Wiernik, P. H. *Cancer Immun.* **2006**, *6*, 5.
